# Supplementary material
Source: publisher figshare collection journal article supplement (https://acs.figshare.com/ndownloader/files/5831250)
Supplement: Supplementary file 1 [file 5831250]

**[Supporting Information]****Imidazolinium Salts as Catalysts for the Ring-Opening Alkylation of *meso* Epoxides by Alkylaluminum Complexes****Hongying Zhou, E. Joseph Campbell, and SonBinh T. Nguyen\***

*Department of Chemistry  
Northwestern University  
2145 Sheridan Rd.  
Evanston IL 60208-3113*

**Supporting information available:** Synthetic procedures and characterization data for **2** and **6**, experimental and analytical procedures (including a typical GC trace) (3 pages). This material is available free of charge via the Internet at <http://pubs.acs.org>.

**General information and materials.** Toluene and C<sub>6</sub>D<sub>6</sub> was distilled over sodium/benzophenone. Cyclohexene oxide, cyclopentene oxide, 2,3-butene oxide, and 2,3-epoxy-2,3-dimethylbutane were dried over CaH<sub>2</sub>. All solvents were distilled under nitrogen and saturated with nitrogen prior to use. 2,3-epoxy-2,3-dimethylbutane was a gift from Dr. Chunbang Li and was synthesized according to literature procedure.<sup>1</sup> All other reagents were purchased from the Aldrich Chemical Company and used without further purification, unless otherwise noted.

<sup>1</sup>H NMR spectra were recorded on a Varian Mercury 400 FT-NMR (400.75 MHz for <sup>1</sup>H and 75.432 MHz for <sup>13</sup>C). <sup>1</sup>H and <sup>13</sup>C chemical shifts are in ppm downfield from tetramethylsilane (TMS,  $\delta$  scale) with the residual solvent resonances as internal standards. Elemental analyses were performed by Atlantic Microlab, Inc. (Norcross, GA).

GC analyses of reaction mixtures were carried out on a Hewlett Packard 5890A equipped with an FID detector and an HP3396A integrator. The column used was a 30-m HP-5 capillary column with 0.32-mm inner diameter and 0.25- $\mu$ m film thickness. Flow rate = 1.8 mL/min for He carrier gas. GC yields were determined through integration of the product peak against 1,2,4,5-tetramethylbenzene (internal standard) using pre-established response factors. Retention times for various components of the reaction mixture were assigned by the injection of a pure sample of each component in the reaction.

**General reaction procedure for catalyst synthesis:** Imidazolinium salts<sup>2,3</sup> **1**, **3**, and **4** and olefin **7**<sup>4</sup> were synthesized according to literature procedures. Compound **2** was synthesized by adapting the literature procedure for the known imidazolinium salts. The free carbene **5** can be generated by the deprotonation of the imidazolinium salt **1** with potassium hydride.<sup>3</sup>

**Synthesis of *N,N'*-bis-(2,6-diisopropylphenyl)-4,5-dimethylimidazolinium tetrafluoroborate (**2**):**

Into a 10-mL round bottom flask was added triethyl orthoformate (1.52 g, 8.63 mmol), ammonium

tetrafluoroborate (0.91 g, 8.63 mmol) and *N, N'*-bis-(2,6-diisopropylphenylamino)-1,2-dimethylethane (3.52 g, 8.63 mmol). The mixture was heated at 120 °C for 12 h. The ethanol formed during the reaction was removed under reduced pressure. The crude product was crystallized from absolute ethanol and the solid was dried *in vacuo* to give white needles. Yield = 1.48 g (33%). <sup>1</sup>H NMR (400 MHz, CD<sub>2</sub>Cl<sub>2</sub>): δ 7.91 (s, 1H, ArN-C<sup>+</sup>H-ArN), 7.54 (m, 2H, ArH), 7.36 (d, 4H, *J* = 8 Hz, ArH), 5.03 (d, 2H, *J* = 1.6 Hz, -N(Ar)-CH-CH<sub>3</sub>), 2.97 (m, 4H, CH(CH<sub>3</sub>)<sub>2</sub>), 1.39 (d, 18H, *J* = 6.8 Hz, CH(CH<sub>3</sub>)<sub>2</sub>), 1.22 (m, 12H, CH(CH<sub>3</sub>)<sub>2</sub>, CH<sub>3</sub>). <sup>13</sup>C NMR (400 MHz, CD<sub>2</sub>Cl<sub>2</sub>): δ 157.1 (ArN-C<sup>+</sup>H-ArN), 147.0, 146.9, 131.9, 127.7, 125.7, 125.4, 65.2, 29.9, 29.7, 26.2, 25.2, 24.1, 23.6, 19.2, 12.8. APCIMS: *m/z* 419.4 (M<sup>+</sup>, 100). Anal. Calcd. for C<sub>29</sub>H<sub>39</sub>BF<sub>4</sub>N<sub>2</sub>: C, 68.77; H, 8.56; N, 5.53; Found: C, 68.97; H, 8.76; N, 5.59.

**Synthesis of 1,3-bis-(2,6-diisopropylphenyl)imidazol-2-ylidene triethylaluminum (6).** This compound was synthesized using a modified literature procedure.<sup>5</sup> Triethylaluminum (95 mg, 0.83 mmol) in toluene (10 mL) was added into a 50-mL Schlenk flask equipped with a stir bar and stirred rapidly. A solution of the freshly prepared 1,3-bis-(2,6-diisopropylphenyl)imidazol-2-ylidene (320 mg, 0.82 mmol) in toluene (25 mL) was added dropwise via a syringe. After complete addition, the reaction was stirred at room temperature for 24 h. The solvent was removed under reduced pressure to afford the product in quantitative yield. <sup>1</sup>H NMR (400 MHz, C<sub>6</sub>D<sub>6</sub>): δ 7.40 (m, 2H), 7.05 (d, 4H, *J* = 6.0 Hz), 3.36 (s, 4H), 3.19 (m, 4H), 1.44 (d, 12H, *J* = 6.0 Hz), 1.26 (t, 9H, *J* = 13.2 Hz), 1.02 (d, 12H, *J* = 6.0 Hz). <sup>13</sup>C NMR (C<sub>6</sub>D<sub>6</sub>): δ 205.98, 147.06, 136.16, 130.29, 128.68, 125.11, 54.59, 29.27, 26.65, 23.85, 11.91, 1.19. EIMS: *m/z* 389.3 ([M-AlEt<sub>3</sub>]<sup>+</sup>, 100).

**General reaction procedure for the alkylation of *meso* epoxides.** All reactions were carried out under a dry nitrogen atmosphere using either standard Schlenk techniques or in an inert-atmosphere glovebox unless otherwise noted. Into a 25-mL round bottom flask equipped with a magnetic stir bar was added the epoxide (1.0 mmol), internal standard (30 mg, 0.22 mmol) and toluene (3 mL). The catalyst (5 mol%) and the triethylaluminum reagent (280 μL, 2.0 mmol) was added to the flask and the reaction was stirred at room temperature for 12-24 h.

The reaction was quenched with HCl (4 mL of a 1M solution in H<sub>2</sub>O) and extracted with ether (3 x 5 mL). The combined organic extracts was washed successively with brine (10 mL) and H<sub>2</sub>O (10 mL) and dried over MgSO<sub>4</sub>. The solution was filtered and an aliquot was analyzed on GC to determine yield.

**GC trace for the alkylation of cyclohexene oxide by AlEt<sub>3</sub> catalyzed by catalyst 2**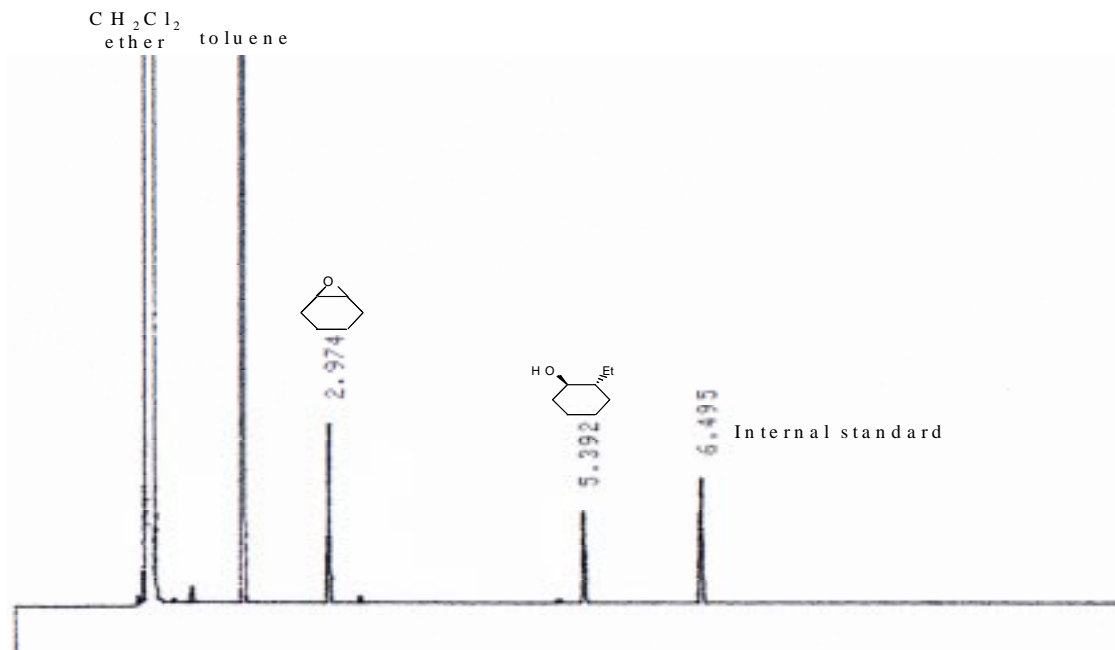

**Temp. Program: initial temp. = 50 °C, initial time = 0 min, ramp = 10 °C/min,  
final temp. = 250 °C, final time = 10 min.**

**References**

- (1) James, A. P.; Johnstone, R. A. W.; McCarron, M.; Sankey, J. P.; Trenbith, B. *Chem. Commun.* **1998**, 429-430.
- (2) Saba, S.; Brescia, A. M.; Kaloustian, M. K. *Tetrahedron Lett.* **1991**, 32, 5031-5034.
- (3) Arduengo, A. J., III; Krafczyk, R.; Schmutzler, R.; Craig, H. A.; Goerlich, J. R.; Marshall, W. J.; Unverzagt, M. *Tetrahedron* **1999**, 55, 14523-14534.
- (4) Goldwhite, H.; Kaminski, J.; Millhauser, G.; Ortiz, J.; Vargas, M.; Vertal, L.; Lappert, M. F.; Smith, S. J. *J. Organomet. Chem.* **1986**, 310, 21-25.
- (5) Li, X.-W.; Su, J.; Robinson, G. H. *Chem. Commun.* **1996**, 2683-2684.
